# Supplementary material for: Isolation of Smenopyrone, a Bis-γ-Pyrone Polypropionate from the Caribbean Sponge Smenospongia aurea
Source: MDPI journal article supplement (doi:10.3390/md16080285), 2018-08-17
Supplement: s1 [file s1]

## Supplementary Information

- Table S1.**  $^{13}\text{C}$  NMR chemical shift of smenopyrone (**1**) in  $\text{CDCl}_3$  compared with those of the eight diastereomers **4–11** of maurenone.
- Figure S1.** Difference in  $^{13}\text{C}$  NMR chemical shift ( $\Delta\delta$ ) between corresponding atoms of smenopyrone (**1**) and the eight stereoisomers **4–11** of the model compound maurenone.
- Figure S2.** UV and ECD spectra of smenopyrone (**1**).
- Figure S3.** Positive ion mode high-resolution ESI mass spectrum of smenopyrone (**1**).
- Figure S4.** Positive ion mode high-resolution ESI MS/MS spectrum (parent ion at  $m/z$  419.28) and fragmentation of smenopyrone (**1**).
- Figure S5.**  $^1\text{H}$ -NMR spectrum of smenopyrone (**1**) (700 MHz,  $\text{CD}_3\text{OD}$ ).
- Figure S6.** COSY spectrum of smenopyrone (**1**) (700 MHz,  $\text{CD}_3\text{OD}$ ).
- Figure S7.** NOESY spectrum of smenopyrone (**1**) (700 MHz,  $\text{CD}_3\text{OD}$ ).
- Figure S8.** HSQC spectrum of smenopyrone (**1**) (700 MHz,  $\text{CD}_3\text{OD}$ ).
- Figure S9.** HMBC spectrum of smenopyrone (**1**) (700 MHz,  $\text{CD}_3\text{OD}$ ).
- Figure S10.** Expansion of methyl region of the HMBC spectrum of smenopyrone (**1**) (700 MHz,  $\text{CD}_3\text{OD}$ ).

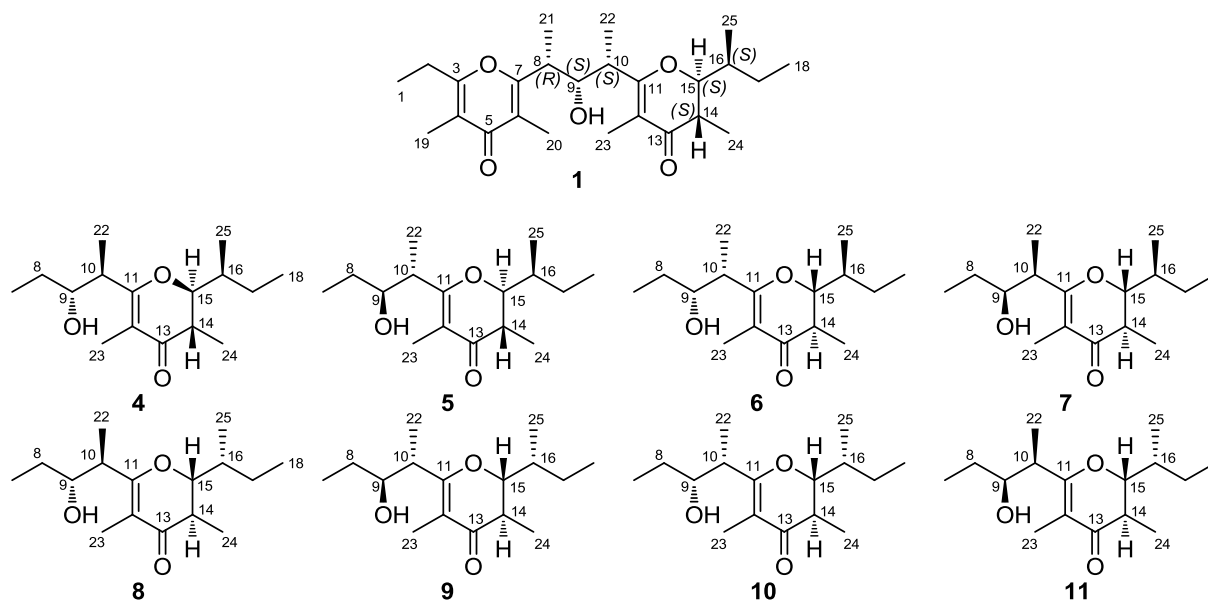

**Table S1.**  $^{13}\text{C}$  NMR chemical shifts of smenopyrone (**1**) in  $\text{CDCl}_3$  compared with those of the eight diastereomers of maurenone, **4-11**.

| Pos.                   |               | $\delta_{\text{C}}$ ( $\text{CDCl}_3$ ) |            |            |            |            |             |             |             |             |
|------------------------|---------------|-----------------------------------------|------------|------------|------------|------------|-------------|-------------|-------------|-------------|
|                        |               | <b>1</b>                                | <b>4</b>   | <b>5</b>   | <b>6</b>   | <b>7</b>   | <b>8</b>    | <b>9</b>    | <b>10</b>   | <b>11</b>   |
| 9                      | CH            | 75.1                                    | 75.5       | 75.4       | 75.1       | 74.8       | 75.3        | 75.3        | 74.8        | 75.2        |
| 10                     | CH            | 38.6                                    | 41.1       | 41.4       | 41.6       | 41.5       | 41.2        | 41.2        | 41.5        | 41.8        |
| 11                     | C             | 172.4                                   | 172.4      | 172.3      | 173.0      | 173.1      | 172.6       | 172.3       | 173.2       | 173.2       |
| 12                     | C             | 108.5                                   | 109.9      | 109.7      | 108.6      | 108.5      | 109.8       | 109.8       | 108.6       | 108.7       |
| 13                     | C             | 195.4                                   | 195.6      | 195.6      | 195.7      | 195.7      | 195.5       | 195.5       | 195.7       | 195.7       |
| 14                     | CH            | 40.6                                    | 40.9       | 40.6       | 40.6       | 40.7       | 40.5        | 40.6        | 40.7        | 40.5        |
| 15                     | CH            | 87.4                                    | 87.8       | 87.0       | 87.0       | 87.4       | 84.5        | 84.5        | 84.7        | 84.2        |
| 16                     | CH            | 35.1                                    | 35.4       | 35.1       | 35.1       | 35.2       | 35.6        | 35.6        | 35.5        | 35.6        |
| 17                     | $\text{CH}_2$ | 22.1                                    | 22.0       | 22.2       | 21.9       | 21.9       | 26.8        | 26.8        | 26.5        | 26.5        |
| 18                     | $\text{CH}_3$ | 12.2                                    | 10.1       | 11.7       | 11.7       | 11.9       | 9.9         | 11.9        | 10.2        | 11.8        |
| 22                     | $\text{CH}_3$ | 13.9                                    | 14.7       | 14.7       | 13.3       | 12.9       | 14.6        | 14.6        | 12.9        | 13.4        |
| 23                     | $\text{CH}_3$ | 9.3                                     | 9.4        | 9.4        | 9.3        | 9.2        | 9.4         | 9.4         | 9.2         | 9.3         |
| 24                     | $\text{CH}_3$ | 10.6                                    | 10.0       | 11.0       | 10.6       | 10.1       | 9.9         | 9.9         | 9.5         | 9.7         |
| 25                     | $\text{CH}_3$ | 16.5                                    | 16.2       | 16.3       | 16.1       | 16.1       | 12.3        | 12.3        | 12.4        | 12.3        |
| $\Sigma \Delta\delta $ |               |                                         | <b>6.6</b> | <b>4.0</b> | <b>3.1</b> | <b>3.7</b> | <b>17.8</b> | <b>15.6</b> | <b>17.1</b> | <b>15.5</b> |

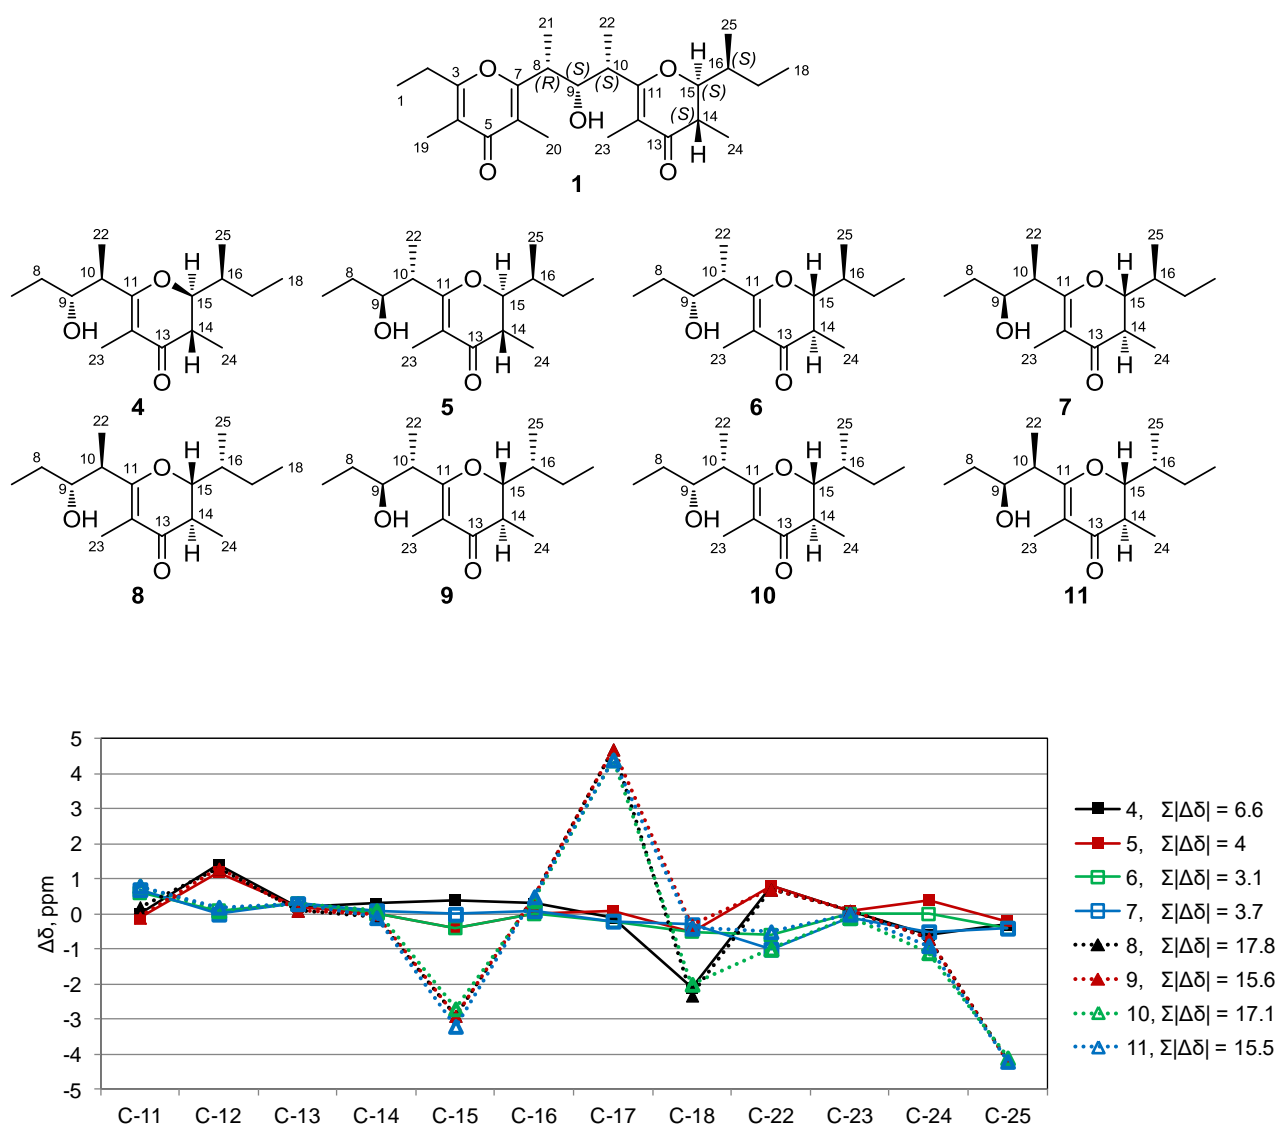

**Figure S1.** Difference in  $^{13}\text{C}$  NMR chemical shift ( $\Delta\delta$ ) between corresponding atoms of smenopyrone (**1**) and the eight stereoisomers **4-11** of the model compound maurenone. The sum of absolute values of  $\Delta\delta$  ( $\Sigma|\Delta\delta|$ ) was used to evaluate the overall fit between **1** and **4-11**.

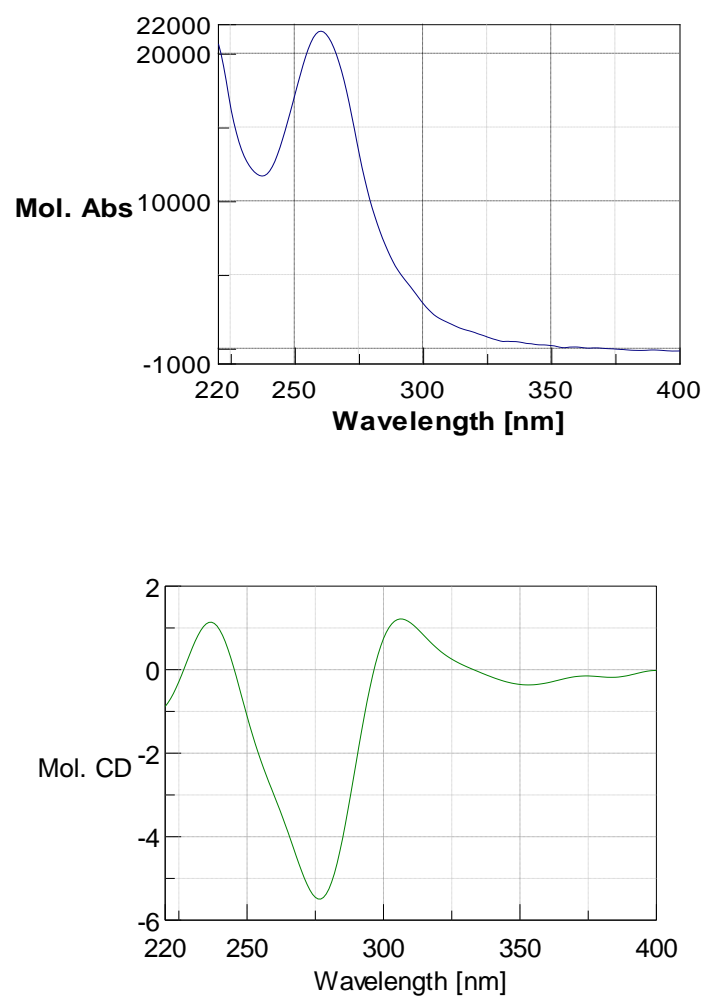

**Figure S2.** UV (top) and ECD (bottom) spectra (MeOH) of smenopyrone (**1**).

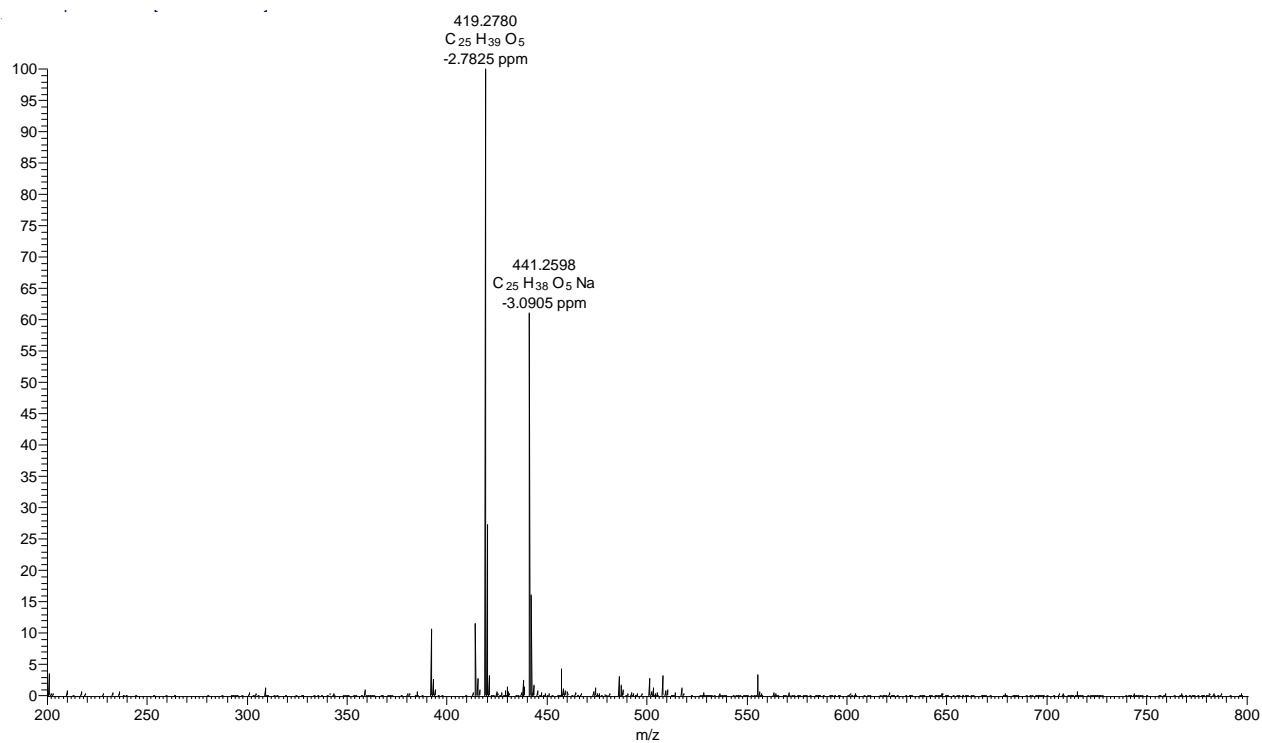

**Figure S3.** Positive ion mode high-resolution ESI mass spectrum of smenopyrone (**1**).

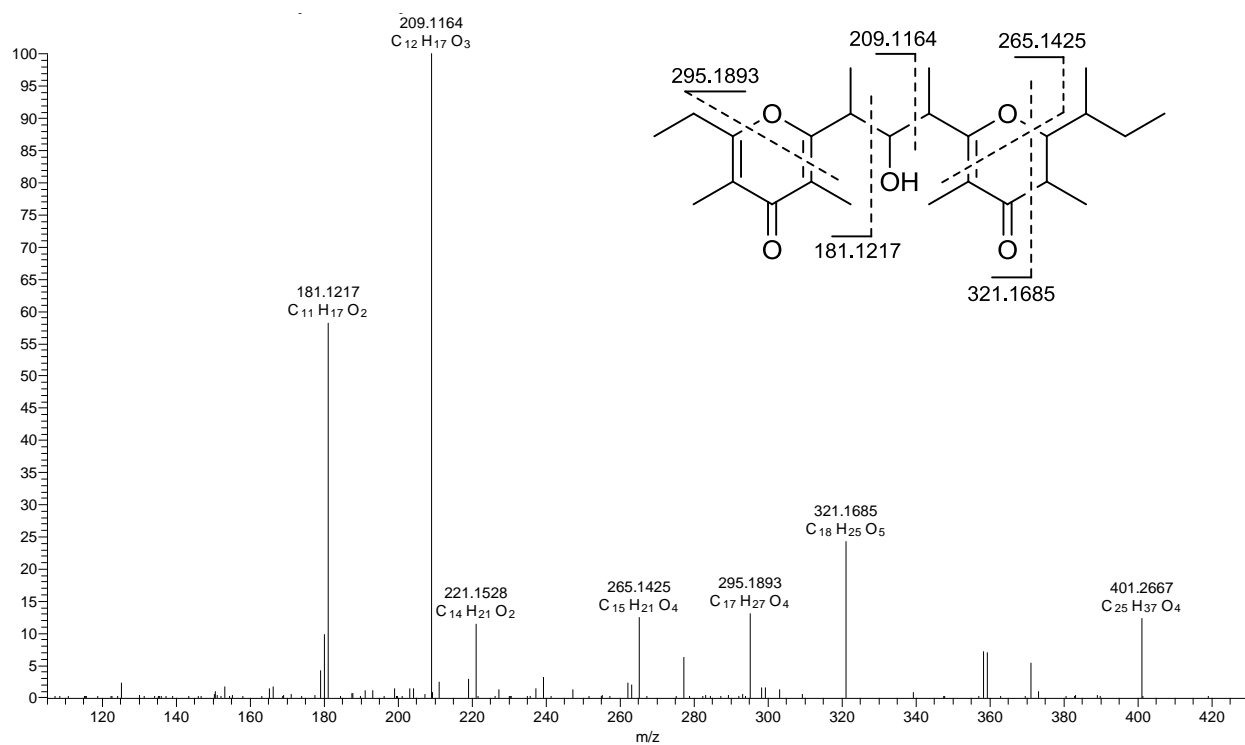

**Figure S4.** Positive ion mode high-resolution ESI MS/MS spectrum (parent ion at  $m/z$  419.28) and fragmentation of smenopyrone (**1**).

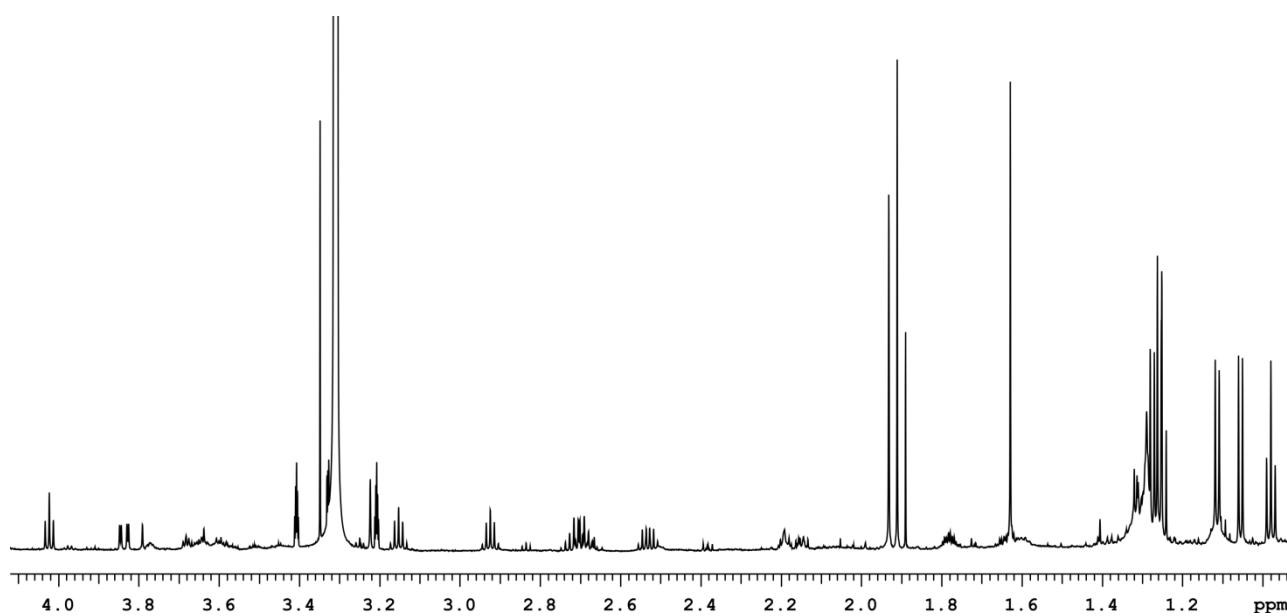

**Figure S5.**  $^1\text{H}$ -NMR spectrum of smenopyrone (**1**) (700 MHz,  $\text{CD}_3\text{OD}$ )

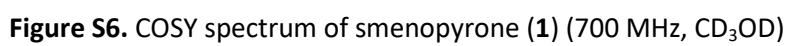

**Figure S6.** COSY spectrum of smenopyrone (**1**) (700 MHz, CD<sub>3</sub>OD)

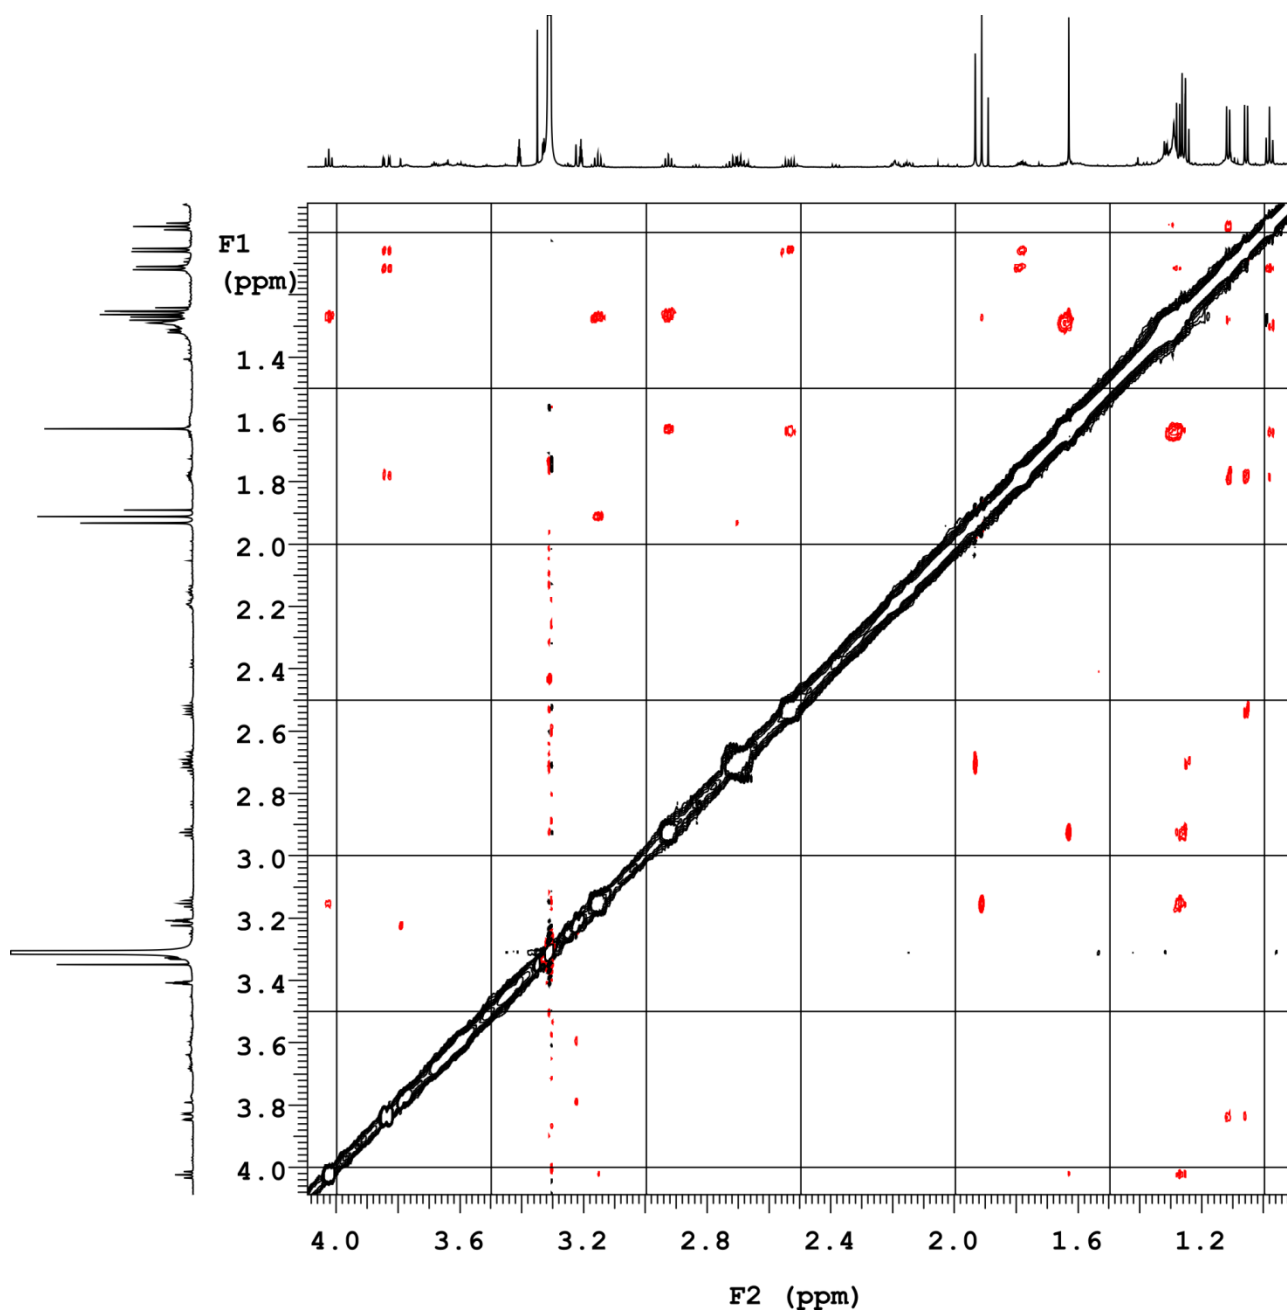

**Figure S7.** NOESY spectrum of smenopyrone (1) (700 MHz, CD<sub>3</sub>OD)



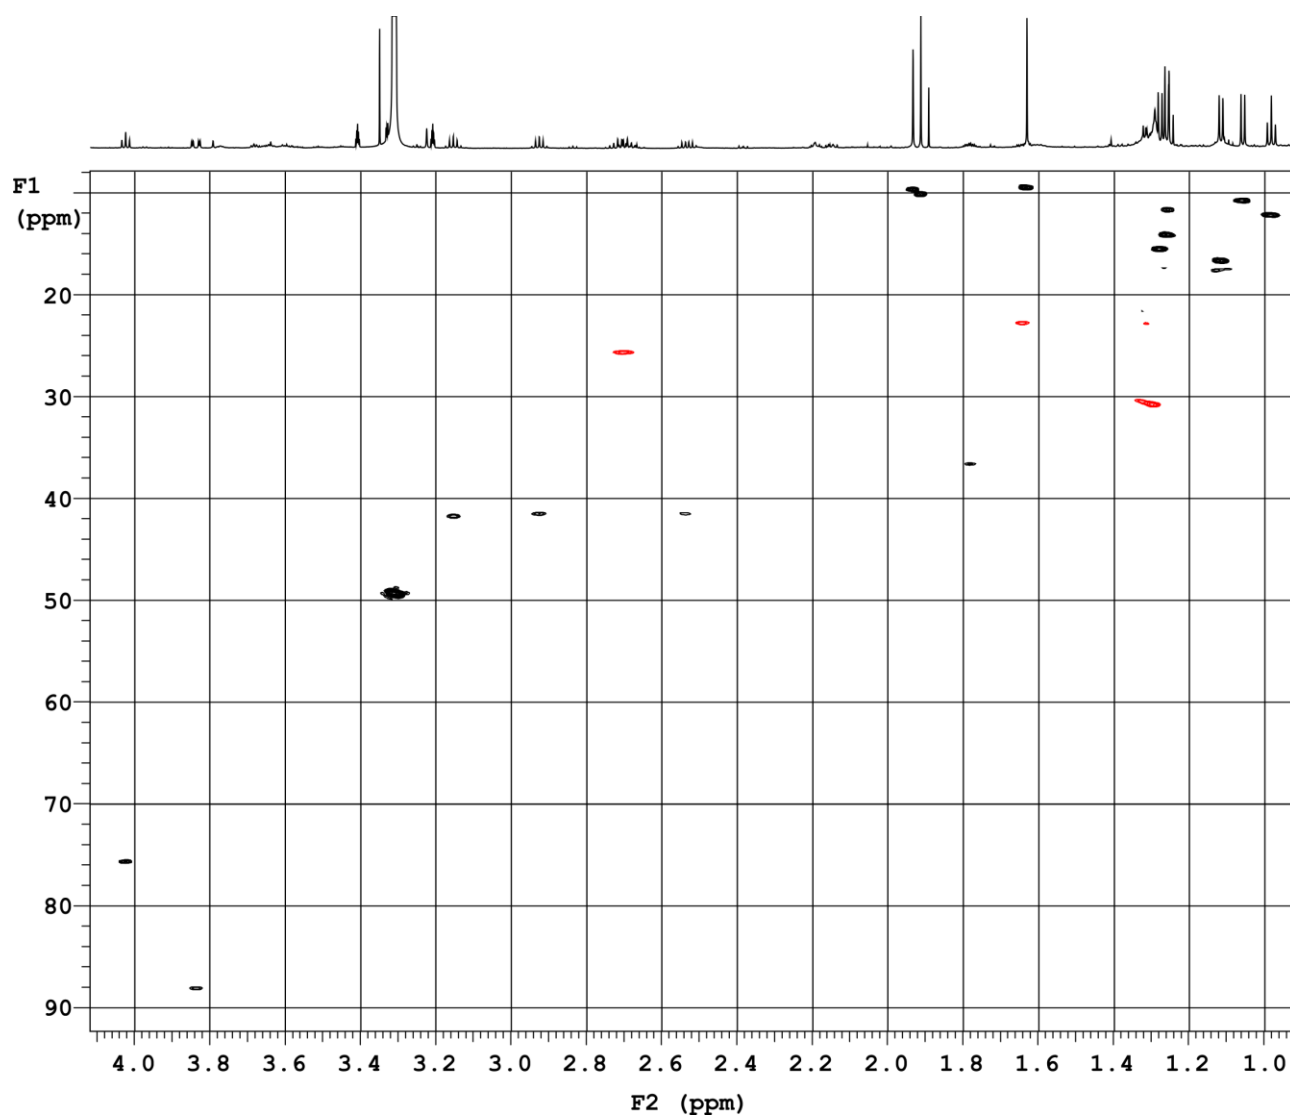

**Figure S8.** HSQC spectrum of smenopyrone (**1**) (700 MHz, CD<sub>3</sub>OD)

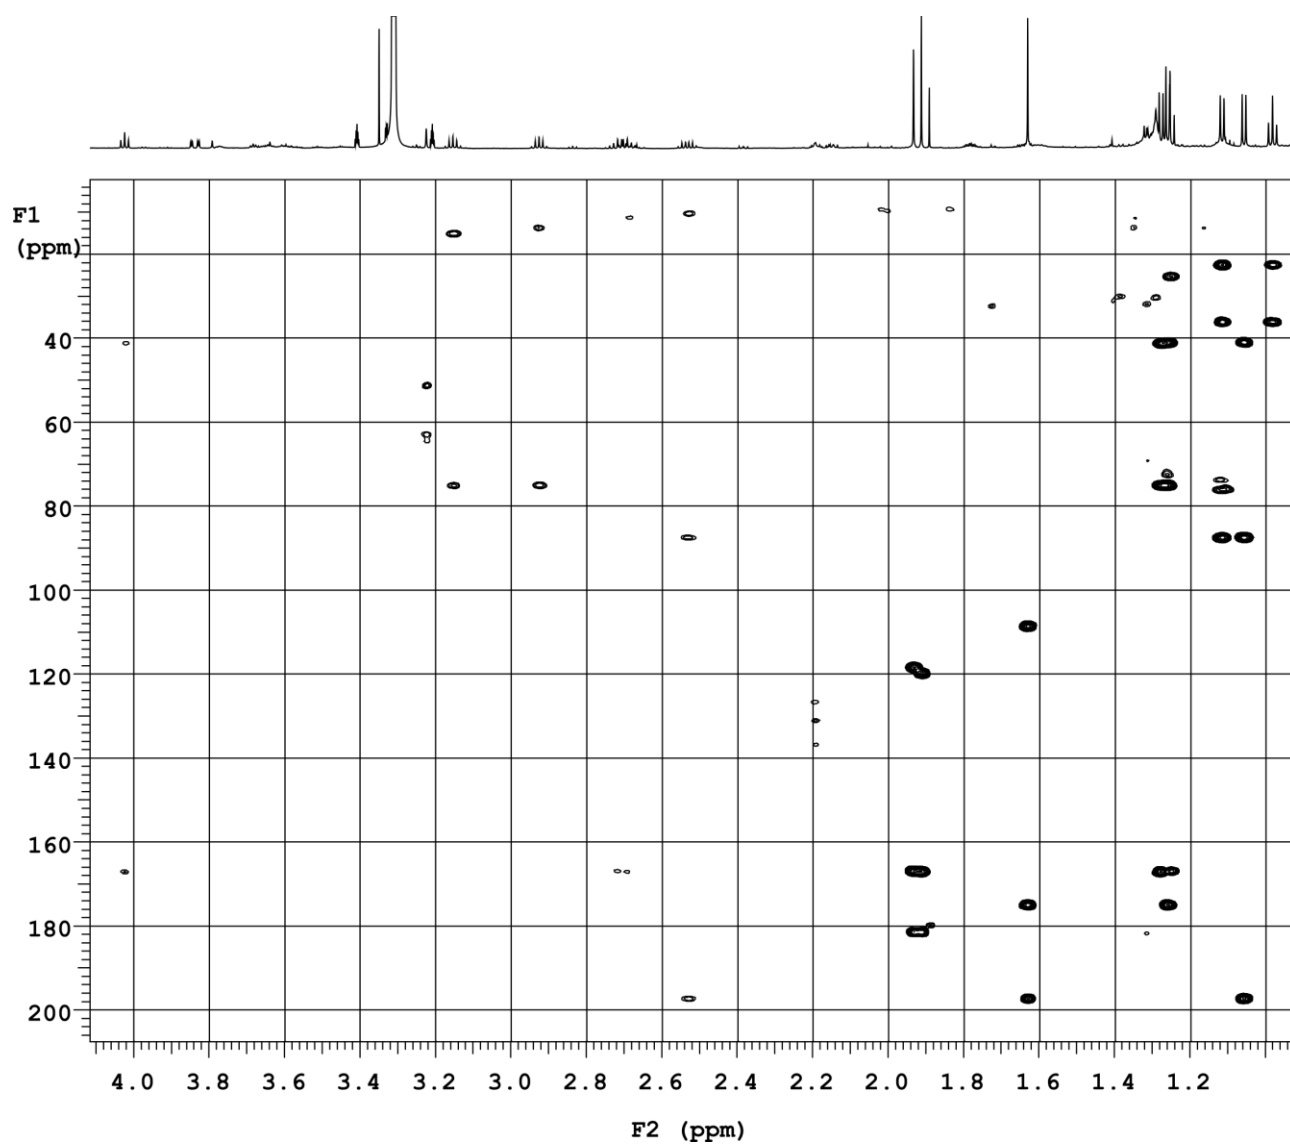

**Figure S9.** HMBC spectrum of smenopyrone (**1**) (700 MHz, CD<sub>3</sub>OD)

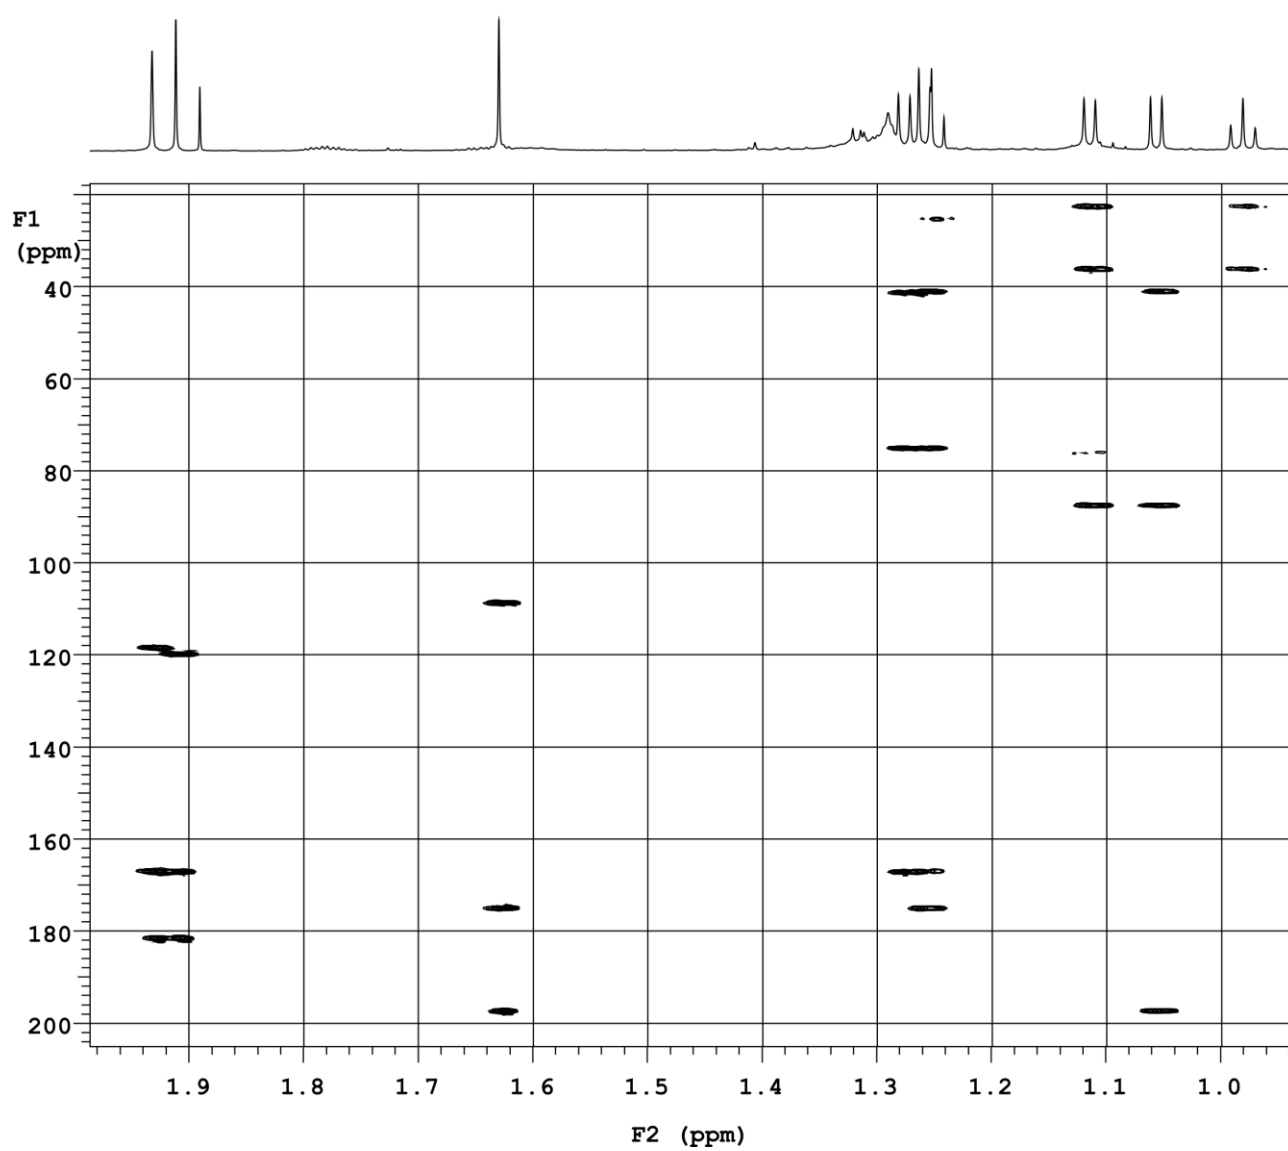

**Figure S10.** Expansion of methyl region of the HMBC spectrum of smenopyrone (**1**) (700 MHz, CD<sub>3</sub>OD)
